# Supplementary material for: Old Mice Accumulate Activated Effector CD4 T Cells Refractory to Regulatory T Cell-Induced Immunosuppression
Source: PubMed Central journal article supplement (PMC5360761; doi:10.3389/fimmu.2017.00283), 2017-03-22
Supplement: image_1.pdf [file image_1.pdf]

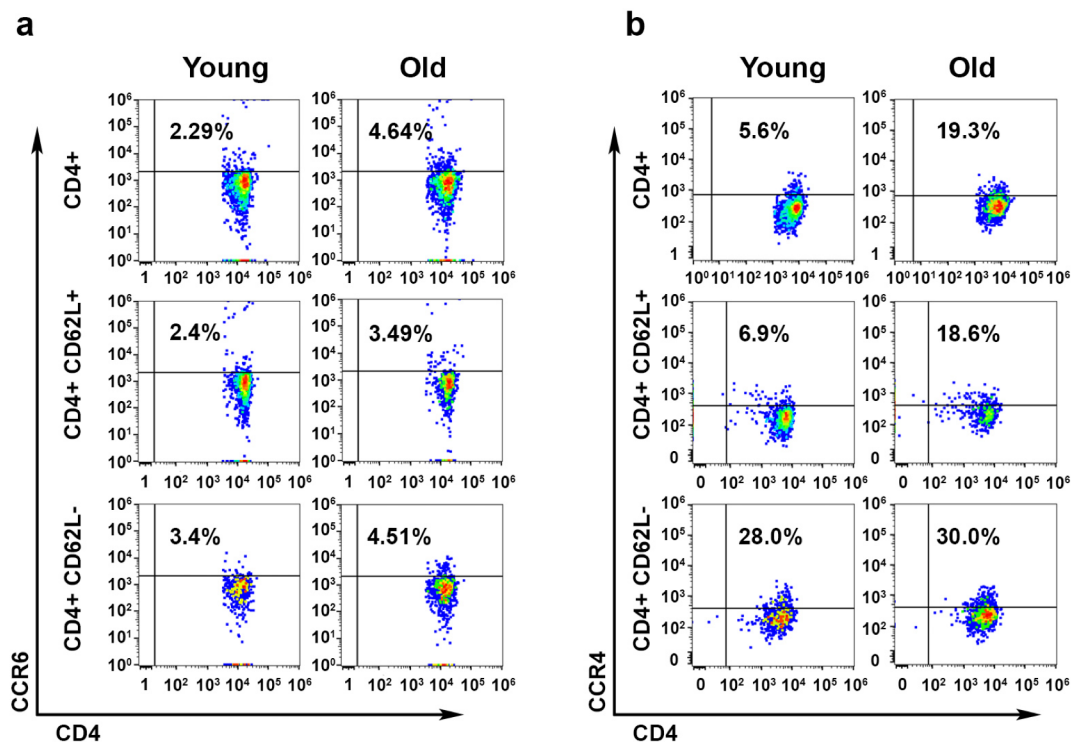

**Supplemental Figure 1. Aging is associated with increased frequency of CD4 T cells expressing the chemokine receptors CCR6 and CCR4.**

CD4+ T cells were gated for CD4+CD62L– Teff or for CD4+CD62L+ non-Teff subsets, and then the frequency of CCR6 (a) and CCR4 (b) chemokine receptors in the different subsets was analyzed. Data are shown in Fig. 1 as means  $\pm$  SEM of 30 mice per group, pooled from five independent experiments. *p*-values were calculated by Student's *t*-test; \**p* < 0.05; \*\**p* < 0.01; \*\*\**p* < 0.001
